# Supplementary material
Source: HighWire-hosted journal article supplement (https://bmjopen.bmj.com/content/7/11/e017644)
Supplement: inline-supplementary-material-1 [file inline-supplementary-material-1.pdf]

## Supplementary file 1. Preliminary search strategy for PubMed.

### Details - PubMed - NCBI

PubMed

### Search Details

|                                                                                                                                                                                                                                                                                                                                                                                                                                                                                                                                                                                      |                                                                                                                                                                                                                                                         |
|--------------------------------------------------------------------------------------------------------------------------------------------------------------------------------------------------------------------------------------------------------------------------------------------------------------------------------------------------------------------------------------------------------------------------------------------------------------------------------------------------------------------------------------------------------------------------------------|---------------------------------------------------------------------------------------------------------------------------------------------------------------------------------------------------------------------------------------------------------|
| <b>Query Translation:</b>                                                                                                                                                                                                                                                                                                                                                                                                                                                                                                                                                            |                                                                                                                                                                                                                                                         |
| <pre>(drug[All Fields] OR drug'[All Fields] OR drug''[All Fields] OR drug's[All Fields] OR drug0001[All Fields] OR drug1[All Fields] OR drug1's[All Fields] OR drug2[All Fields] OR drug2gene[All Fields] OR drug3[All Fields] OR drug39[All Fields] OR drug3d[All Fields] OR drug9054[All Fields] OR druga[All Fields] OR drugabacus[All Fields] OR drugabble[All Fields] OR drugabilis[All Fields] OR drugability[All Fields] OR drugability'[All Fields] OR drugabilityevaluation[All Fields] OR drugable[All Fields] OR drugable'[All Fields] OR drugablity[All Fields] OR</pre> |                                                                                                                                                                                                                                                         |
| <input type="button" value="Search"/>                                                                                                                                                                                                                                                                                                                                                                                                                                                                                                                                                | <input type="button" value="URL"/>                                                                                                                                                                                                                      |
| <b>Result:</b>                                                                                                                                                                                                                                                                                                                                                                                                                                                                                                                                                                       |                                                                                                                                                                                                                                                         |
| <a href="#">8127</a>                                                                                                                                                                                                                                                                                                                                                                                                                                                                                                                                                                 |                                                                                                                                                                                                                                                         |
| <b>Translations:</b>                                                                                                                                                                                                                                                                                                                                                                                                                                                                                                                                                                 |                                                                                                                                                                                                                                                         |
| type 2 diabetes                                                                                                                                                                                                                                                                                                                                                                                                                                                                                                                                                                      | "diabetes mellitus, type 2"[MeSH Terms] OR "type 2 diabetes mellitus"[All Fields] OR "type 2 diabetes"[All Fields]                                                                                                                                      |
| adults                                                                                                                                                                                                                                                                                                                                                                                                                                                                                                                                                                               | "adult"[MeSH Terms] OR "adult"[All Fields] OR "adults"[All Fields]                                                                                                                                                                                      |
| mortality                                                                                                                                                                                                                                                                                                                                                                                                                                                                                                                                                                            | "mortality"[Subheading] OR "mortality"[All Fields] OR "mortality"[MeSH Terms]                                                                                                                                                                           |
| cerebrovascular disease                                                                                                                                                                                                                                                                                                                                                                                                                                                                                                                                                              | "cerebrovascular disorders"[MeSH Terms] OR ("cerebrovascular"[All Fields] AND "disorders"[All Fields]) OR "cerebrovascular disorders"[All Fields] OR ("cerebrovascular"[All Fields] AND "disease"[All Fields]) OR "cerebrovascular disease"[All Fields] |
| stroke                                                                                                                                                                                                                                                                                                                                                                                                                                                                                                                                                                               | "stroke"[MeSH Terms] OR "stroke"[All Fields]                                                                                                                                                                                                            |
| cardiovascular disease                                                                                                                                                                                                                                                                                                                                                                                                                                                                                                                                                               | "cardiovascular diseases"[MeSH Terms] OR ("cardiovascular"[All Fields] AND "diseases"[All Fields]) OR "cardiovascular diseases"[All Fields] OR ("cardiovascular"[All Fields] AND "disease"[All Fields]) OR "cardiovascular disease"[All Fields]         |
| <b>Database:</b>                                                                                                                                                                                                                                                                                                                                                                                                                                                                                                                                                                     |                                                                                                                                                                                                                                                         |
| PubMed                                                                                                                                                                                                                                                                                                                                                                                                                                                                                                                                                                               |                                                                                                                                                                                                                                                         |
| <b>User query:</b> drug* AND (type 2 diabetes OR type 2 diabetic) AND adults AND (mortality OR cerebrovascular disease OR stroke OR cardiovascular disease)                                                                                                                                                                                                                                                                                                                                                                                                                          |                                                                                                                                                                                                                                                         |
